# Supplementary material for: GE11 peptide-decorated acidity-responsive micelles for improved drug delivery and enhanced combination therapy of metastatic breast cancer
Source: Royal Society of Chemistry journal article supplement (doi:10.1039/d2tb01816k), 2022-01-01
Supplement: d2tb01816k1.pdf [file d2tb01816k1.pdf]

***Supporting information***

**GE11 peptide-decorated acidity-responsive micelles for improved drug delivery and enhanced combination therapy of metastatic breast cancer**

Zhihao Guo<sup>a,b,c,1\*</sup>, Junhui Sui<sup>b,d,1</sup>, Yumei Li<sup>a</sup>, Qinchuan Wei<sup>a</sup>, Cailing Wei<sup>a</sup>, Linyun Xiu<sup>a</sup>, Ruohua Zhu<sup>a</sup>, Yong Sun<sup>b\*</sup>, Jianshe Hu<sup>c</sup>, Ji-Liang Li<sup>a,e\*</sup>

<sup>a</sup> School of Biomedical Engineering, School of Ophthalmology & Optometry, Eye Hospital, Wenzhou Medical University, 270 Xueyuan Road, Wenzhou, 325027, China.

<sup>b</sup> National Engineering Research Center for Biomaterials, Sichuan University, 29 Wangjiang Road, Chengdu, 610064, China.

<sup>c</sup> Center for Molecular Science and Engineering, College of Science, Northeastern University, 3-11 Wenhua Road, Shenyang, 110819, China.

<sup>d</sup> College of Life Science and Technology, Xinxiang Medical University, 601 Jinsui Road, Xinxiang, 453003, China.

<sup>e</sup> Wenzhou Institute, University of Chinese Academy of Sciences, 1 Jinlian Road, Wenzhou, 325000, China.

**Supplementary Fig. S1-S4 and Table S1-S2**

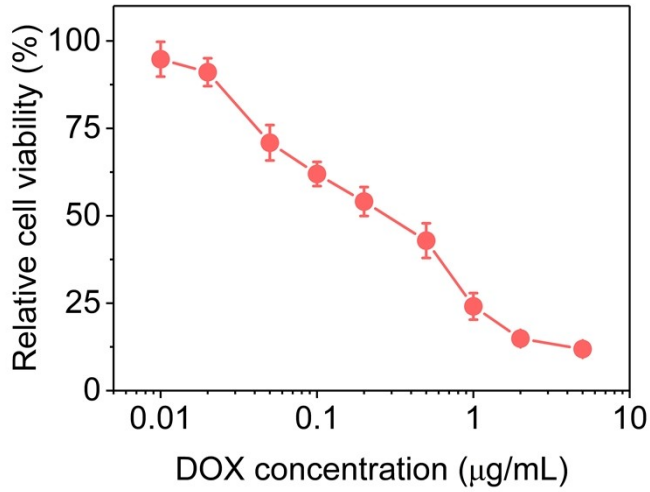

**Fig. S1.** *In vitro* cytotoxicity of free DOX combination with CEL at a mass ratio of 1/5 for 24 h.

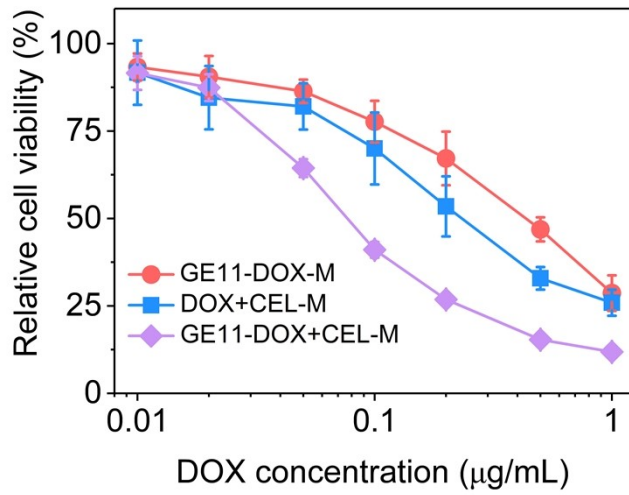

**Fig. S2.** Relative cell viability of 4T1 cells after treatment with the drug-loaded micelles for 48 h.

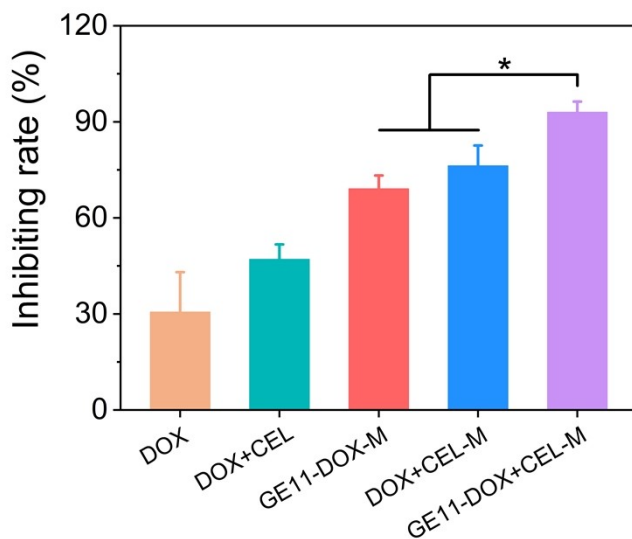

**Fig. S3.** Tumor inhibiting rate calculated by tumor volume.

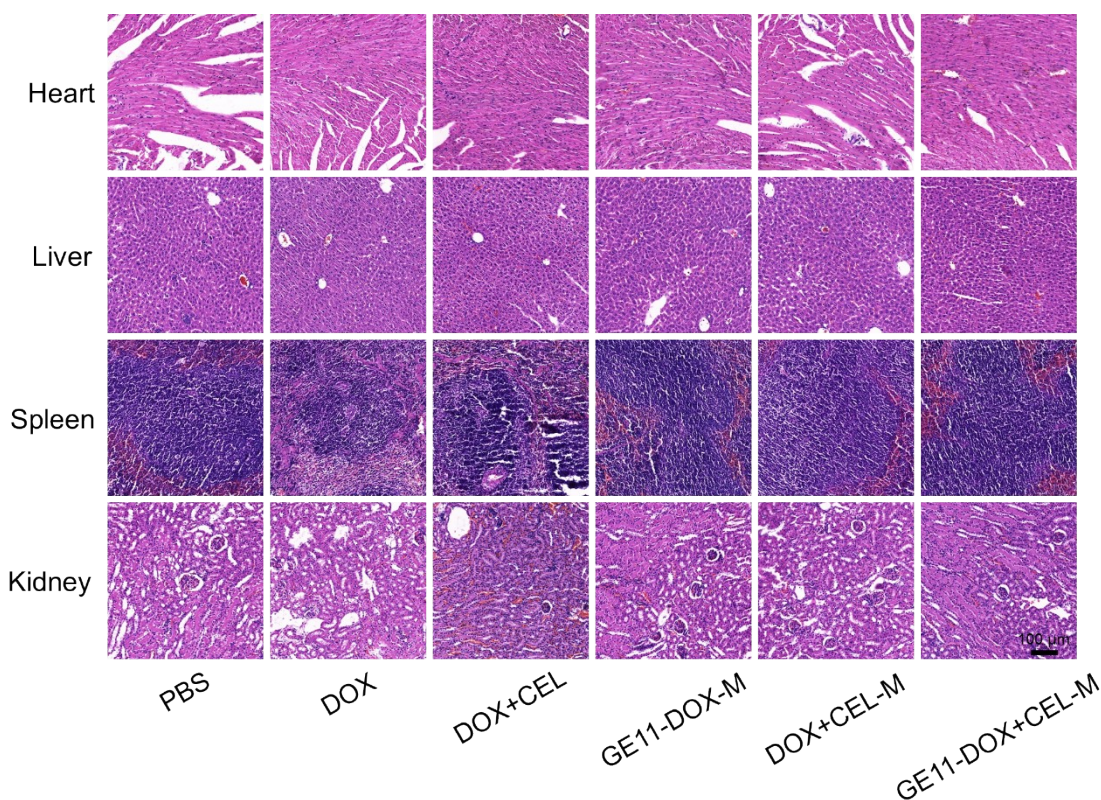

**Fig. S4.** Histopathological analysis of major organs in 4T1 tumor-bearing mice after different treatments.

**Table S1.** Properties of drug-loaded micelles.

| Drug-loaded micelles | Size (D. nm) | PDI         | LC of DOX (%) | LC of CEL (%) | EE of CEL (%) |
|----------------------|--------------|-------------|---------------|---------------|---------------|
| GE11-DOX-M           | 81.3 ± 3.5   | 0.21 ± 0.03 | 6.7           | —             | —             |
| DOX+CEL-M            | 92.5 ± 2.4   | 0.18 ± 0.02 | 5.3           | 28.4          | 83.1          |
| GE11-DOX+CEL-M       | 100.6 ± 5.4  | 0.16 ± 0.03 | 4.3           | 23.2          | 71.9          |

**Table S2.** *In vitro* cytotoxicity of drug-loaded micelles against 4T1 cells for 24 h or 48 h.

| Micelles       | IC <sub>50</sub> /DOX (µg/mL) (24 h) | IC <sub>50</sub> /DOX (µg/mL) (48 h) |
|----------------|--------------------------------------|--------------------------------------|
| GE11-DOX-M     | 3.50 ± 0.07                          | 0.45 ± 0.05                          |
| DOX+CEL-M      | 1.14 ± 0.05                          | 0.26 ± 0.06                          |
| GE11-DOX+CEL-M | 0.22 ± 0.03                          | 0.07 ± 0.01                          |
